# Supplementary material for: Targeting angiopoietin-like protein 3 and Interleukin-1β alleviated liver and kidney injury through attenuation of lipotoxicity and normalization of glycolipid metabolism in db/db mice
Source: Research Square preprint supplement (doi:10.21203/rs.3.rs-7930376/v1), 2025-11-18
Supplement: Supplementary file 1 [file 3a3661d6e5f421002737420d.docx]

**Supplementary materials**


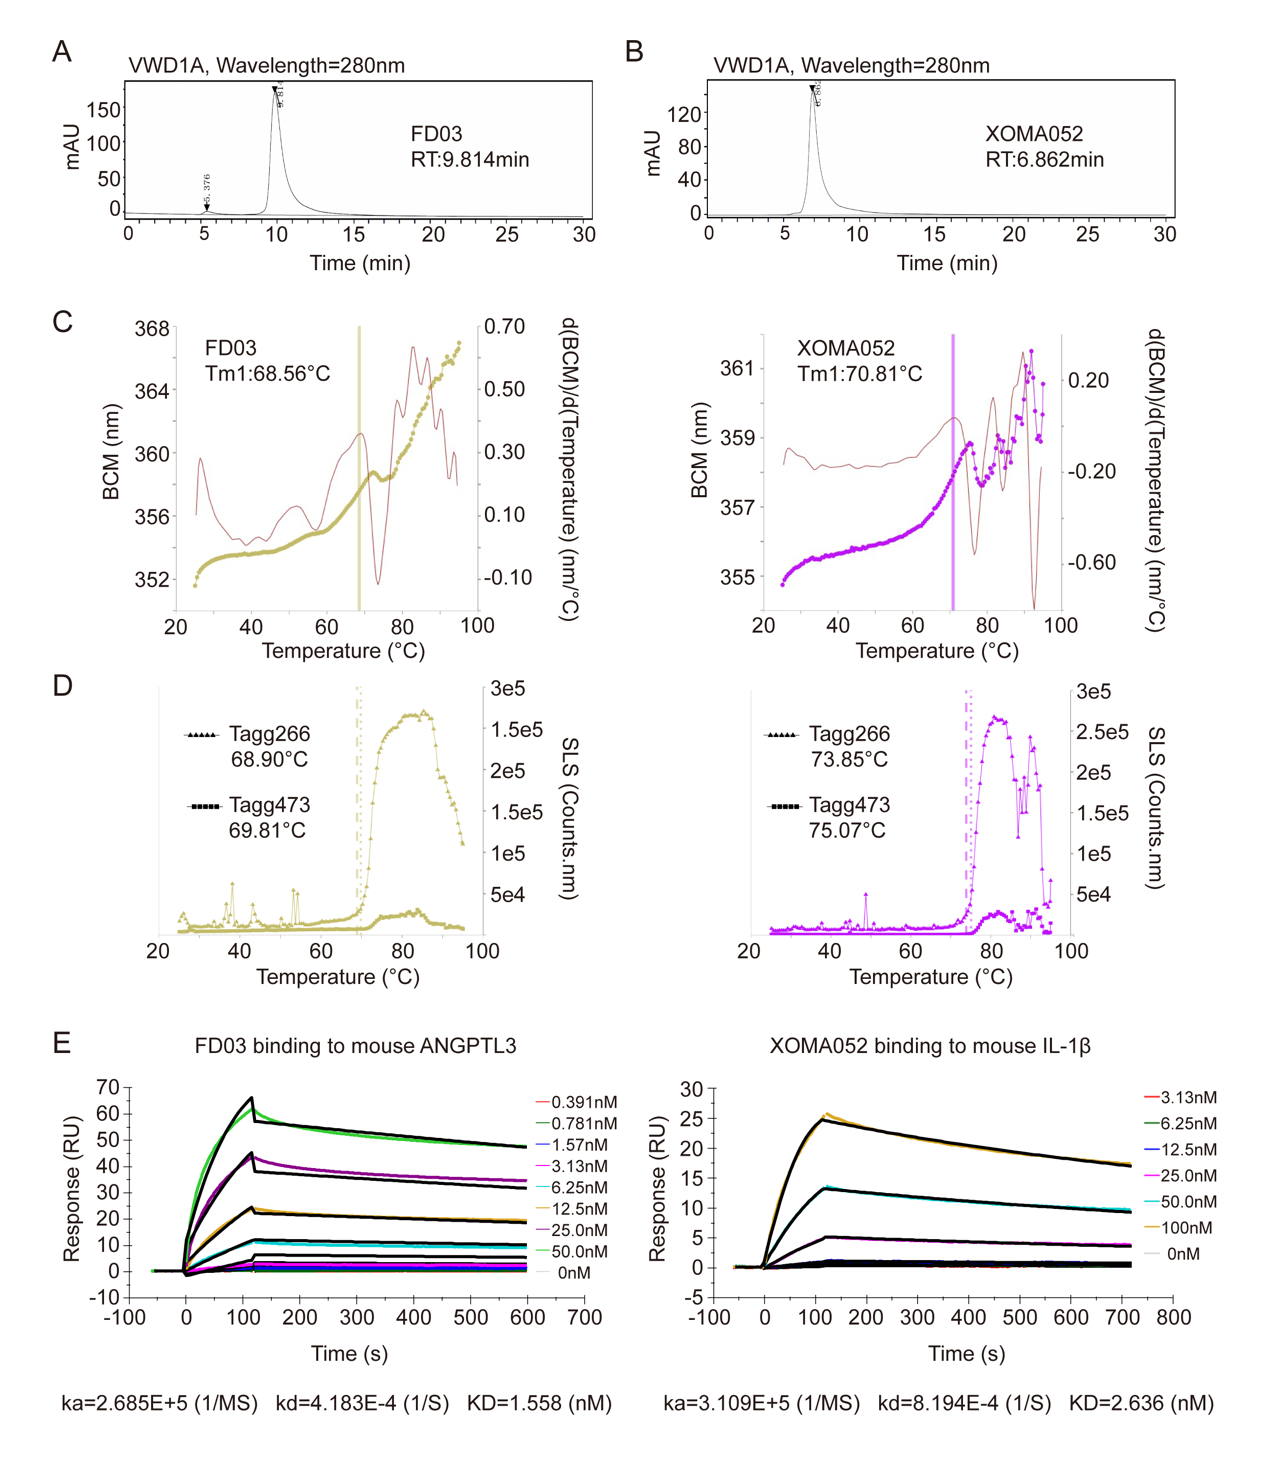


**Fig. S1** **The purity, thermal stability and biological activity of FD03 and XOMA052** (A-B) SEC-HPLC analysis of FD03 and XOMA052 (RT: retention time). (C-D) Thermal stability analysis of FD03 and XOMA052. (Tm: melting temperature; Tagg: aggregation temperature) (E-F) Affinity analysis of FD03 for mouse ANGPTL3 and XOMA052 for mouse IL-1β measured by SPR.

**
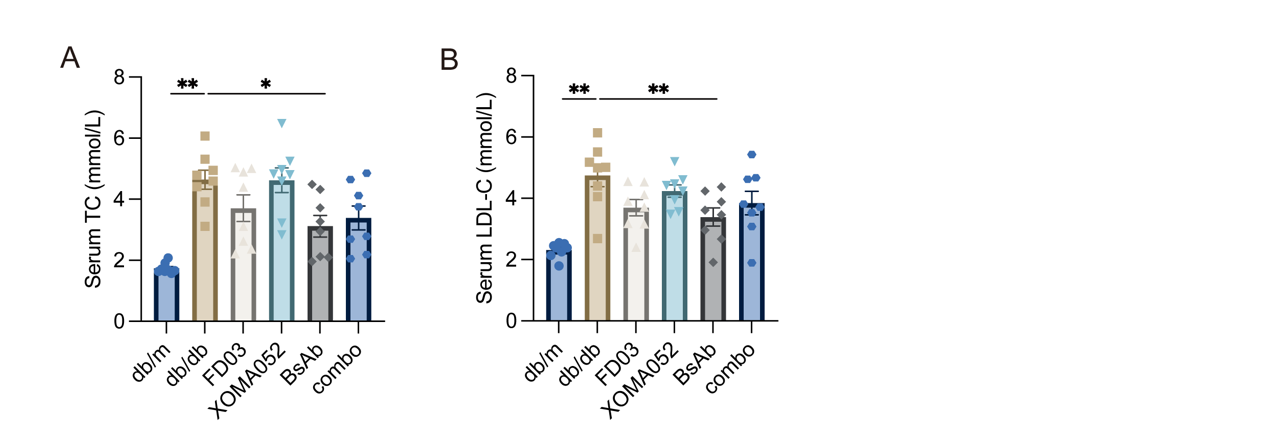
 Fig. S2** **The serum TC and LDL-C levels** (A-B) Quantitative analysis of serum TC (A) and serum LDL-C (B) (n=8). Data in (A-B) are means ± SEM; * *P*<0.05, ** *P*<0.01.


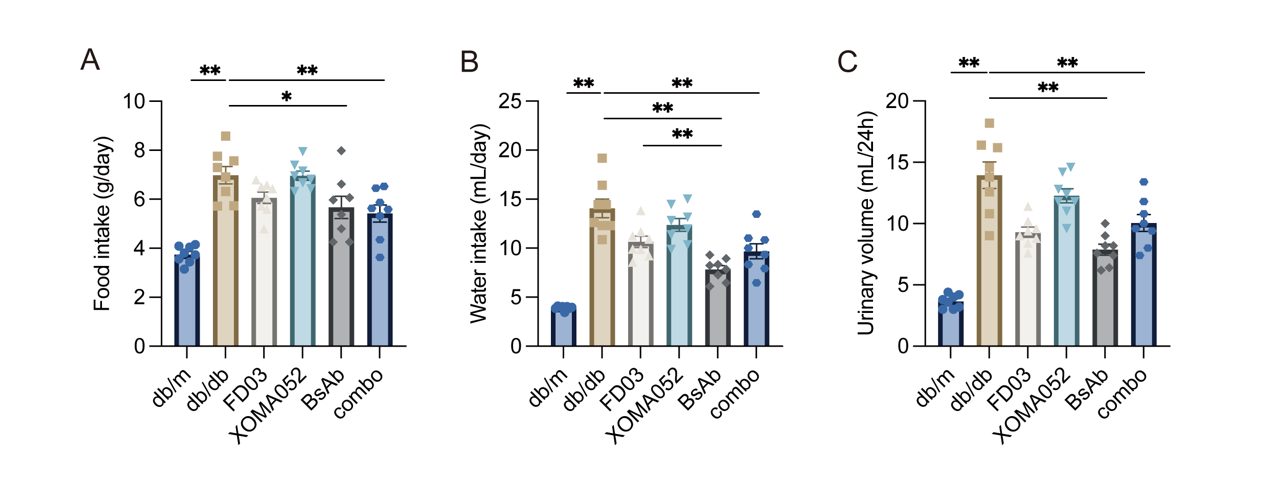


**Fig. S3** **The food and water consumption and urinary output** (A-C) Quantitative analysis of food intake (A), water intake (B) and urinary volume (C) (n=8). Data in (A-C) are means ± SEM; * *P*<0.05, ** *P*<0.01.


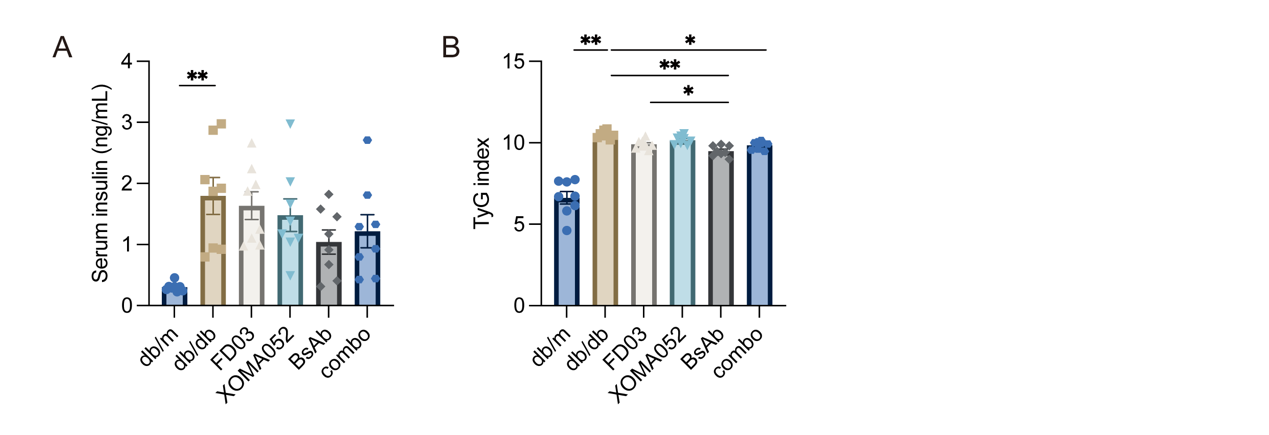


**Fig. S4** **The serum insulin level and TyG index** (A) Quantitative analysis of serum insulin (n=8). (B) Quantitative analysis of TyG index (n=8). Data in (A-B) are means ± SEM; * *P*<0.05, ** *P*<0.01.


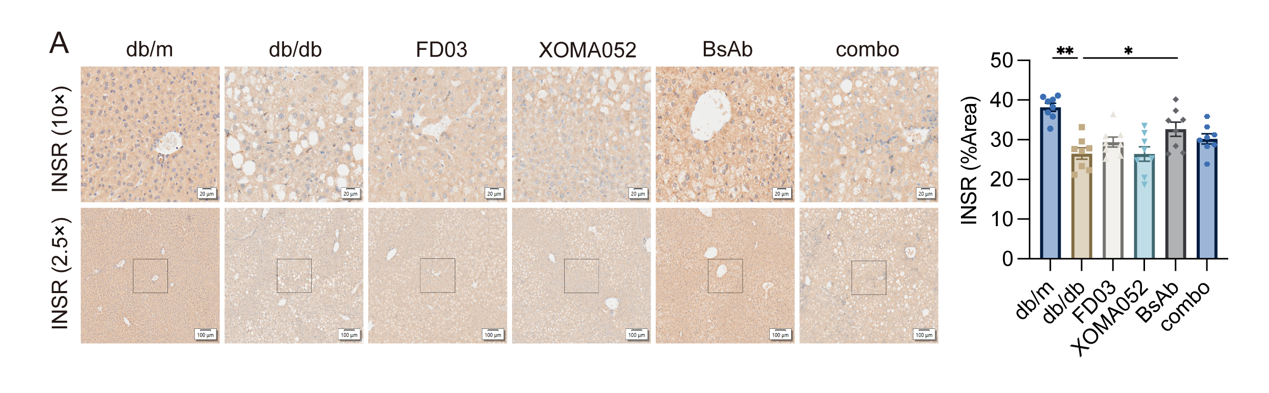
 **Fig. S5** **The INSR expression in liver** (A) Immunohistochemical staining images of INSR of liver samples and quantitative analysis of INSR-positive staining (n=8). Data in (A) are means ± SEM; * *P*<0.05, ** *P*<0.01.
